# Supplementary material for: Influence of Different Heater Structures on the Temperature Field of AlN Crystal Growth by Resistance Heating
Source: MDPI journal article supplement (doi:10.3390/ma14237441), 2021-12-04
Supplement: s1 [file s1]

## Article

# Influence of Different Heater Structures on the Temperature Field of AlN Crystal Growth by Resistance Heating

Ruixian Yu <sup>1</sup>, Chengmin Chen <sup>2,3</sup>, Guodong Wang <sup>1,\*</sup>, Guangxia Liu <sup>2</sup>, Shouzhi Wang <sup>1</sup>, Xiaobo Hu <sup>1,\*</sup>, Ma Lei <sup>4</sup>, Xiangang Xu <sup>1</sup> and Lei Zhang <sup>1,\*</sup>

<sup>1</sup> State Key Laboratory of Crystal Materials, Institute of Novel Semiconductors, Shandong University, Jinan 250100, China; yuruixian0001@126.com (R.Y.); wangshouzhi6@163.com (S.W.); xxu@sdu.edu.cn (X.X.)

<sup>2</sup> Energy Institute, Qilu University of Technology (Shandong Academy of Sciences), Jinan 250100, China; cm\_chen1989@163.com (C.C.); liugx@sderi.cn (G.L.)

<sup>3</sup> Jinan Institute of supercomputing technology, Jinan 250100, China

<sup>4</sup> School of Opto-Electronic Engineering, Zaozhuang University, Zaozhuang 277160, China; leima\_1017@163.com

\* Correspondence: guodong9631@sdu.edu.cn (G.W.); xbhu@sdu.edu.cn (X.H.); leizhang528@sdu.edu.cn (L.Z.)

**Citation:** Yu, R.; Chen, C.; Wang, G.; Liu, G.; Wang, S.; Hu, X.; Lei, M.; Xu, X.; Zhang, L. Influence of Different Heater Structures on the Temperature Field of AlN Crystal Growth by Resistance Heating. *Materials* **2021**, *14*, 7441. <https://doi.org/10.3390/ma14237441>

Academic Editor: Rainer Niewa

Received: 1 October 2021

Accepted: 30 November 2021

Published: 4 December 2021

**Publisher's Note:** MDPI stays neutral with regard to jurisdictional claims in published maps and institutional affiliations.

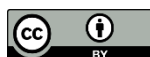

**Copyright:** © 2021 by the authors. Licensee MDPI, Basel, Switzerland. This article is an open access article distributed under the terms and conditions of the Creative Commons Attribution (CC BY) license (<https://creativecommons.org/licenses/by/4.0/>).

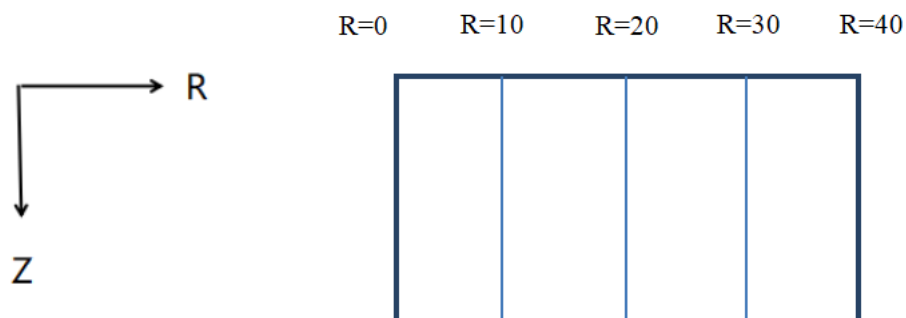

**Figure S1.** Schematic diagram of the Z direction at different positions along the R direction.

**Table S1.** The temperature gradient along the Z direction at different positions along the R direction (The unit is K/cm, 0.3 mm is the position close to the center, and 40 mm is the position close to the crucible wall) .

| R position | Side heating 1 | Side 1 heater + bottom heater | Side 1 heater + top heater | Side 1 heater + side 2 heater |
|------------|----------------|-------------------------------|----------------------------|-------------------------------|
| 0.3        | 1.956667       | 2.445                         | 1.7                        | 1.866666667                   |
| 10         | 1.961667       | 2.441666667                   | 1.683333333                | 1.85                          |
| 20         | 1.928333       | 2.395                         | 1.676666667                | 1.816666667                   |
| 30         | 1.845          | 2.403333333                   | 1.633333333                | 1.766666667                   |
| 40         | 1.675          | 2.04                          | 1.423333333                | 1.6                           |
